# Supplementary material for: Combined effects of water temperature, grazing snails and terrestrial herbivores on leaf decomposition in urban streams
Source: PeerJ. 2019 Oct 8;7:e7580. doi: 10.7717/peerj.7580 (PMC6788434; doi:10.7717/peerj.7580)
Supplement: Dataset S3 [file peerj-07-7580-s003.xlsx]

## Sheet: Sheet1
Intact (g)	Intact Specific leaf weight (g/mm2)	Damaged (g)	Damaged Specific leaf weight (g/mm2)
0.0013	4.59781e-05	0.0024	8.48826e-05
0.0022	7.78091e-05	0.0024	8.48826e-05
0.0013	4.59781e-05	0.0027	9.5493e-05
0.0026	9.19562e-05	0.0011	3.89045e-05
0.0011	3.89045e-05	0.0019	6.71988e-05
0.0015	5.30516e-05	0.002	7.07355e-05
0.0016	5.65884e-05	0.0027	9.5493e-05
0.0015	5.30516e-05	0.0024	8.48826e-05
0.0023	8.13459e-05	0.0014	4.95149e-05
0.0008	2.82942e-05	0.0027	9.5493e-05
0.001	3.53678e-05	0.0031	0.00010964
0.0013	4.59781e-05	0.0013	4.59781e-05
0.0009	3.1831e-05	0.0023	8.13459e-05
0.0014	4.95149e-05	0.0022	7.78091e-05
0.0017	6.01252e-05	0.0019	6.71988e-05
0.0024	8.48826e-05	0.0018	6.3662e-05
0.002	7.07355e-05	0.0016	5.65884e-05
0.0012	4.24413e-05	0.0033	0.000116714
0.0008	2.82942e-05	0.0015	5.30516e-05
0.0014	4.95149e-05	0.0031	0.00010964
0.0015	5.30516e-05	0.0019	6.71988e-05
0.0017	6.01252e-05	0.0024	8.48826e-05
0.0011	3.89045e-05	0.0017	6.01252e-05
0.001	3.53678e-05	0.0024	8.48826e-05
0.0026	9.19562e-05	0.0026	9.19562e-05
0.0009	3.1831e-05	0.0024	8.48826e-05
0.001	3.53678e-05	0.0025	8.84194e-05
0.0012	4.24413e-05	0.0024	8.48826e-05
0.0023	8.13459e-05	0.0014	4.95149e-05
0.0018	6.3662e-05	0.0034	0.00012025
