# Supplementary material for: Combined effects of water temperature, grazing snails and terrestrial herbivores on leaf decomposition in urban streams
Source: PeerJ. 2019 Oct 8;7:e7580. doi: 10.7717/peerj.7580 (PMC6788434; doi:10.7717/peerj.7580)
Supplement: Dataset S5 [file peerj-07-7580-s005.xlsx]

## Sheet: Sheet1
Number	Initial mass (g)	Final mass (g)	Breakdown rate	Mass loss	leaf type	temperature	snail
1	10.03	5.15	0.0266634	0.48654	Intact	Ambient	Yes
2	9.99	4.91	0.0284124	0.508509	Intact	Ambient	Yes
3	10	5.27	0.0256222	0.473	Intact	Ambient	Yes
4	10.02	5.42	0.0245795	0.459082	Intact	Ambient	Yes
5	10.04	5.05	0.0274876	0.497012	Intact	Ambient	Yes
6	9.99	2.34	0.0580573	0.765766	Intact	Warming	Yes
7	10.01	3.4	0.0431924	0.66034	Intact	Warming	Yes
8	9.98	3.18	0.0457481	0.681363	Intact	Warming	Yes
9	9.99	2.85	0.0501706	0.714715	Intact	Warming	Yes
10	10.01	3.25	0.0449972	0.675325	Intact	Warming	Yes
11	9.98	5.44	0.0242722	0.45491	Intact	Ambient	No
12	10	5.81	0.0217202	0.419	Intact	Ambient	No
13	10.03	5.42	0.0246194	0.459621	Intact	Ambient	No
14	10.02	5.31	0.0253997	0.47006	Intact	Ambient	No
15	9.97	4.87	0.0286595	0.511535	Intact	Ambient	No
16	10.01	4.33	0.0335207	0.567433	Intact	Warming	No
17	10.03	4.61	0.0310941	0.540379	Intact	Warming	No
18	10.03	4.83	0.0292294	0.518445	Intact	Warming	No
19	10.02	4.56	0.0314904	0.54491	Intact	Warming	No
20	9.98	4.45	0.0323072	0.554108	Intact	Warming	No
21	10.04	4.79	0.0296019	0.522908	Insect damaged	Ambient	Yes
22	10.04	5.35	0.0251792	0.467131	Insect damaged	Ambient	Yes
23	10	5.43	0.0244258	0.457	Insect damaged	Ambient	Yes
24	10.03	5.18	0.026431	0.483549	Insect damaged	Ambient	Yes
25	9.99	5.67	0.0226558	0.432432	Insect damaged	Ambient	Yes
26	9.97	2.59	0.0539169	0.740221	Insect damaged	Warming	Yes
27	9.98	2.93	0.0490232	0.706413	Insect damaged	Warming	Yes
28	10.02	3.16	0.0461604	0.684631	Insect damaged	Warming	Yes
29	10.02	3.39	0.0433501	0.661677	Insect damaged	Warming	Yes
30	10.03	3.71	0.0397819	0.63011	Insect damaged	Warming	Yes
31	10.02	5.43	0.0245058	0.458084	Insect damaged	Ambient	No
32	10	6.15	0.0194453	0.385	Insect damaged	Ambient	No
33	10.03	5.9	0.0212251	0.411765	Insect damaged	Ambient	No
34	10.02	6.03	0.0203134	0.398204	Insect damaged	Ambient	No
35	9.99	5.89	0.0211331	0.41041	Insect damaged	Ambient	No
36	10.02	4.74	0.0299418	0.526946	Insect damaged	Warming	No
37	9.98	4.43	0.0324873	0.556112	Insect damaged	Warming	No
38	9.95	4.68	0.030171	0.529648	Insect damaged	Warming	No
39	10.03	4.71	0.0302357	0.530409	Insect damaged	Warming	No
40	10.02	4.35	0.0333763	0.565868	Insect damaged	Warming	No
